# Supplementary material
Source: MDPI journal article supplement (https://www.mdpi.com/2075-163X/13/1/95)
Supplement: s1 [file s1]

**Table S1.** General features and genomic comparison between *A. ferrooxidans* YQ-N3 and the other published genomes *A. ferrooxidans*.

| Strain                           | Geographic origin                          | GenBank accession no | Genome size (Mb) | GC%      | CDS  | Plasmids | Scaffolds |
|----------------------------------|--------------------------------------------|----------------------|------------------|----------|------|----------|-----------|
| <i>A. ferrooxidans</i> YQ-N3     | Shanxi, China                              | GCA_020221655.1      | 3.21772          | 58.7316% | 3132 | 5        | 6         |
| <i>A. ferrooxidans</i> YNTRS-40  | -                                          | GCA_013462805.1      | 3.25704          | 58.4696% | 3168 | 1        | 2         |
| <i>A. ferrooxidans</i> ATCC23270 | Bituminous coal mine effluent              | GCA_000021485.1      | 2.9824           | 58.8%    | 2927 | -        | 1         |
| <i>A. ferrooxidans</i> BYM       | Baiyin, China                              | GCA_019856615.1      | 3.2555           | 58.4696% | 3134 | 1        | 2         |
| <i>A. ferrooxidans</i> NFP31     | Volcanic ash deposits on Miyakejima, Japan | GCA_020887015.1      | 3.24985          | 58.4724% | 3193 | 1        | 2         |
| <i>A. ferrooxidans</i> ATCC53993 | -                                          | GCA_000020825.1      | 2.88504          | 58.9%    | 2811 | -        | 1         |
| <i>A. ferrooxidans</i> CCM4253   | Mine waters, Czech Republic                | GCA_003233765.1      | 3.19656          | 58.6%    | 3073 | -        | 15        |
| <i>A. ferrooxidans</i> DSM16786  | Wudalianchi Heilongjiang, China            | GCA_018853455.1      | 3.67579          | 58.4%    | 3636 | -        | 49        |
| <i>A. ferrooxidans</i> YQH-1     | Wudalianchi volcano water, China           | GCA_001418795.1      | 3.11122          | 58.60%   | 3012 | -        | 96        |
| <i>A. ferrooxidans</i> Hel18     | Flue dust                                  | GCA_001559335.1      | 3.10916          | 58.6%    | 3065 | -        | 123       |
| <i>A. ferrooxidans</i> PQ506     | Santiago, Chile                            | GCA_018854475.1      | 3.37146          | 58.3%    | 3342 | -        | 277       |
| <i>A. ferrooxidans</i> PQ505     | Santiago, Chile                            | GCA_018854395.1      | 3.51657          | 58.4%    | 3534 | -        | 305       |
| <i>A. ferrooxidans</i> CF3       | Santiago, Chile                            | GCA_018854495.1      | 3.01139          | 58.7%    | 3057 | -        | 310       |
| <i>A. ferrooxidans</i> F221      | -                                          | GCA_018854265.1      | 3.00995          | 58.7%    | 3006 | -        | 360       |
| <i>A. ferrooxidans</i> BY0502    | -                                          | GCA_001652185.1      | 2.97667          | 56.8%    | 3026 | -        | 295       |
| <i>A. ferrooxidans</i> BY-3      | Gansu, China                               | GCA_010577825.1      | 3.83234          | 57.8%    | 3777 | -        | 194       |
| <i>A. ferrooxidans</i> RVS1      | Andacollo gold mining area, Argentina      | GCA_003931975.1      | 2.82631          | 58.8%    | 2705 | -        | 49        |
| <i>A. ferrooxidans</i> DLC-5     | -                                          | GCA_000732185.1      | 4.18422          | 57.6%    | -    | -        | 2090      |
| <i>A. ferrooxidans</i> COP1      | -                                          | GCA_018854355.1      | 3.008            | 58.8%    | 3855 | -        | 1561      |
| <i>A. ferrooxidans</i> S10       | Santiago, Chile                            | GCA_018854365.1      | 2.953            | 58.8%    | 3998 | -        | 1827      |
| <i>A. ferrooxidans</i> TFBk      |                                            | GCA_024626545.1      | 3.62032          | 57.9%    | 3640 | -        | 159       |
| <i>A. ferrooxidans</i> GD-A      |                                            | GCA_024606825.1      | 2.7863           | 58.9%    | 2776 |          | 135       |
| <i>A. ferrooxidans</i> GD-B      |                                            | GCA_024606715.1      | 2.79519          | 58.9%    | 2806 |          | 155       |
| <i>A. ferrooxidans</i> GD-0      |                                            | GCA_024592575.1      | 2.77163          | 58.9%    | 2765 |          | 139       |
| <i>A. ferrooxidans</i> BN        |                                            | GCA_024606725.1      | 3.41125          | 58.5%    | 3489 |          | 171       |
| <i>A. ferrooxidans</i> ZBY       |                                            | GCA_024606765.1      | 3.40092          | 58.5%    | 3476 |          | 159       |
| <i>A. ferrooxidans</i> DX        |                                            | GCA_024606705.1      | 3.15885          | 58.5%    | 3216 |          | 201       |

Note: “-” indicates no data.

**Table S2.** List of selected genes identified in strain YQ-N3 strain via KEGG annotation, including genes for iron and sulfur metabolism.

| Gene name | Gene length | KEGG gene ID      | KEGG orthology description                              |
|-----------|-------------|-------------------|---------------------------------------------------------|
| fdxA      | 327bp       | afr: AFE_0014     | ferredoxin                                              |
| feoA      | 288bp       | afr:AFE_2523      | ferrous iron transport protein A                        |
| feoB      | 2349bp      | afr:AFE_2524      | ferrous iron transport protein B                        |
| hemH      | 1014bp      | afr:AFE_0179      | protoporphyrin/coproporphyrin ferrochelatase            |
| cyc2      | 1458bp      | afr:AFE_3153      | iron: rusticyanin reductase                             |
| resB      | 1845bp      | afr:AFE_3112      | cytochrome c biogenesis protein                         |
| hyaC      | 756bp       | afr:AFE_2429      | Ni/Fe-hydrogenase 1 B-type cytochrome subunit           |
| coxA      | 1884bp      | afe:Lferr_2747    | cytochrome c oxidase subunit I                          |
| coxB      | 765bp       | afe:Lferr_2748    | cytochrome c oxidase subunit II                         |
| coxC      | 555bp       | afr:AFE_3148      | cytochrome c oxidase subunit III                        |
| porA      | 984bp       | tth:THITH_06955   | pyruvate ferredoxin oxidoreductase alpha subunit        |
| porB      | 1164bp      | tig:THII_3692     | pyruvate ferredoxin oxidoreductase beta subunit         |
| porC      | 603bp       | tth:THITH_06960   | pyruvate ferredoxin oxidoreductase gamma subunit        |
| -         | 2340bp      | afe:Lferr_1935    | iron complex outer membrane receptor protein            |
| fdxA      | 621bp       | afr:AFE_1844      | ferredoxin                                              |
| fdx       | 306bp       | afr:AFE_1541      | ferredoxin, 2Fe-2S                                      |
| rus       | 564bp       | afr:AFE_3146      | rusticyanin                                             |
| -         | 1035bp      | afe:Lferr_1212    | iron complex transport system substrate-binding protein |
| petA      | 621bp       | afe:Lferr_2707    | ubiquinol-cytochrome c reductase iron-sulfur subunit    |
| petB      | 1209bp      | afe:Lferr_2708    | ubiquinol-cytochrome c reductase cytochrome b subunit   |
| petC      | 729bp       | afr:AFE_3111      | ubiquinol-cytochrome c reductase cytochrome c1 subunit  |
| erpA      | 372bp       | afj:AFERRID_10140 | iron-sulfur cluster insertion protein                   |
| moaD      | 243bp       | afr:AFE_0975      | sulfur-carrier protein                                  |
| iscA      | 324bp       | afr:AFE_0675      | iron-sulfur cluster assembly protein                    |
| doxDA     | 1083bp      | afe:Lferr_0045    | thiosulfate dehydrogenase (quinone)                     |
| doxA      | 1083bp      | afj:AFERRID_13680 | thiosulfate dehydrogenase (quinone) small subunit       |
| cysN      | 1353bp      | afr:AFE_3125      | sulfate adenylyltransferase subunit 1                   |
| cysD      | 939bp       | afe:Lferr_2723    | sulfate adenylyltransferase subunit 2                   |
| cysJ      | 1767bp      | afr:AFE_3121      | sulfite reductase (NADPH) flavoprotein alpha-component  |
| cysI      | 1692bp      | afr:AFE_3122      | sulfite reductase (NADPH) hemoprotein beta-component    |
| cysH      | 738bp       | afr:AFE_3123      | phosphoadenosine phosphosulfate reductase               |
| sqr       | 1140bp      | afr:AFE_2601      | sulfide:quinone oxidoreductase                          |
| hdrA2     | 1056bp      | afr:AFE_2553      | heterodisulfide reductase subunit A2                    |
| hdrB2     | 912bp       | afr:AFE_2550      | heterodisulfide reductase subunit B2                    |
| hdrC2     | 720bp       | afr:AFE_2551      | heterodisulfide reductase subunit C2                    |
| tusA      | 231 bp      | [EC:2.8.1.-]      | sulfurtransferase TusA family protein                   |
| dsrE      | 342bp       | afr:AFE_2556      | tRNA 2-thiouridine synthesizing protein D               |
| thiS      | 201bp       | afr:AFE_0642      | sulfur carrier protein                                  |
